# Supplementary material for: A visual–omics foundation model to bridge histopathology image with transcriptomics
Source: Research Square preprint supplement (doi:10.21203/rs.3.rs-5183775/v1), 2025-04-16
Supplement: Supplementary file 1 [file 013775c28b819a0445a0996e.docx]

| 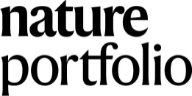 |  |
| --- | --- |
|  |  |
| **Author Checklist** | NMETH-A58071A |
|  | ______________________________ |
| **Please check the items below carefully and add a response in each row of the table to indicate the changes that you have made. Please also check through any additional marked-up edits we may have provided within the manuscript file.** | |
|  |  |
|  |  |
|  |  |
| **Abstract and editor's summary** |  |
| Our guidance: | Your response: |
| The abstract — which should be roughly 150 words long and contain no references — should serve both as a general introduction to the topic and a non-technical summary of your main results and their implications. It should contain a brief account of the background and rationale of the work, followed by a statement of the main conclusions introduced by the phrase 'Here we show' or some equivalent phrase. Because we hope that researchers in a wide range of disciplines will be interested in your work, the abstract should be as accessible as possible, explaining essential but specialized terms concisely. We encourage you to show your abstract to colleagues outside of your direct field of expertise to uncover any problematic concepts. | We have accordingly modified the abstract. |
|  |  |
| **Author information** |  |
| Our guidance: | Your response: |
| We ask that you consult with your coauthors to ensure that all names, affiliations, and titles are represented correctly. Note that if any authors are added or removed after this point then all authors will be requested to provide approval documentation that could potentially delay the production of your paper. | We have checked that, in our manuscript, the names, affiliations, and titles are represented correctly. |
| Please ensure that all affiliations are in the correct sequential order according to their position in the author list. Affiliation 1 must be the first affiliation associated with the first author. Please see this article as an example: https://www.nature.com/articles/s41467-020-16621-x.pdf | We corrected the affiliations in the sequential order according to their position in the author list. |
|  |  |
| **Article structure** |  |
| Our guidance: | Your response: |
| We can accommodate up to 6 display items (Figures or Tables) in the main article and up to 10 Extended Data figures, which will be integrated into the full-text HTML version of your paper and will be appended to the online PDF.   Each Extended Data item must be cited in order in the main text. Each Figure, Table and Extended Data figure must fit easily within an A4 page (210 x 297 mm). Please ensure that the number and size of your Figures, Tables and Extended Data figures fulfil these requirements to avoid any delay in the acceptance of your article. | We have made sure that we have 6 Figures and limited our Extended Data figures to be 10.  We have made sure that all the figures, tables, and Extended Data figures can fit easily within an A4 page (210 x 297 mm). |
| **To comply with this format and optimise the presentation of data in your Article, we suggest the following changes to the display items in your paper:** |  |
| *We allow only 10 Extended data items. Please update accordingly and move 7 items to the SI. Extended Data items must be called out in order in the main text.* | We have limited our Extended Data figures to be 10 and moved 7 items to the SI.. |
| We estimate that the word count of your Article is approximately 6642 words. Please ensure that your revised manuscript does not exceed 6000 words. | We have limited our revised manuscript to 5,997 words. All changes were tracked in the word document. |
| **Please ensure your main manuscript file includes the following sections, in this order:** |  |
| *Title Author list Affiliations Abstract Main text Acknowledgements Author Contributions Statement Competing Interests Statement Tables Figure Legends/Captions (for main text figures) References Methods Data Availability Code Availability (if relevant) Methods-only references* | We have made sure that our main manuscript file includes the sections listed in the left cell and follows the order accordingly. |
| **Please also divide your Main text section into the following sections:** |  |
| *Introduction / Results (with at least one subheading) / Discussion* | We have made sure that our main text section is divided into the sections accordingly. |
|  |  |
| **Main text** |  |
| Our guidance: | Your response: |
| Please shorten any section subheadings that are longer than 60 characters (including spaces). | We have limited section subheadings to 60 characters. |
| Genes must be clearly distinguished from gene products (e.g., “gene Abc encodes a kinase,” not “gene Abc is a kinase”). For genes please provide database-approved official symbols (e.g., NCBI Gene, http://www.ncbi.nlm.nih.gov/gene) for the relevant species the first time each is mentioned; gene aliases may be used thereafter. Italicize gene symbols and functionally defined locus symbols; do not use italics for proteins, noncoding gene products and spelled-out gene names. | We have verified that (1) all the genes are distinguished from gene products, (2) all the genes are using NCBI approved official symbols, and (3) all the functionally defined locus symbols are italicized. |
| Please remove the figure images from the main article file (they should be submitted separately as figure files - more information below). Figure legends/captions should remain in the main manuscript file, in a single section (as specified in the order of sections listed above). | We have removed the figure images from the main article file and put figure legends/captions in a single section in the main manuscript file. |
|  |  |
| **Figures and Tables** |  |
| Our guidance: | Your response: |
| Please see the guidelines linked below for detailed instructions about how your figures should be prepared. Following these instructions will reduce the chances of delays should we need to request replacement artwork from you at a later stage. | We have followed the guideline to prepare the final figures. |
| <https://www.nature.com/documents/NRJs-guide-to-preparing-final-artwork.pdf> |  |
| Please ensure that data presented in a plot, chart or other visual representation format shows data distribution clearly (e.g. dot plots, box-and-whisker plots, violin plots). When using bar charts, please overlay the corresponding data points (as dot plots) whenever possible and always for n ≤ 10. All box-plot elements (center line, limits, whiskers, points) should be defined in the legends accompanied by precise n numbers. |  |
| **Please note that data presentation has to be revised to comply with our policy in extended data figure(s) 7b; 13b.** | We have overlayed the corresponding data points for extended data figure 13b (new extended data figure 7b). For extended data figure 7b (new supplementary figure 3b), the n is 147 which is too large to clearly shows data distributions by overlay the corresponding data points. We have added precise n numbers in the figure legend. |
| Wherever statistics have been derived (e.g. error bars, box plots, statistical significance) the legend needs to provide and define the n number (i.e. the sample size used to derive statistics) as a precise value (not a range). Please define how many replicates were performed and whether they are biological (derived from different experimental units or subjects) or technical (multiple contemporary measurements from the same experimental unit or subject). Samples should be unambiguously described, including a clear definition of the unit of study. In studies using model organisms, cell lines, primary cell cultures, plants or micro-organisms, the unit of study is the smallest object that could be randomly and independently assigned to an intervention. The groups being compared, including control groups, should be clearly defined. If no control group has been used, the rationale for this should be stated. Please ensure there are enough details about sample collection to distinguish between independent data points and technical replicates- splitting a biological sample into 3 tubes or wells receiving the same treatment does not constitute independent replication.  We strongly discourage deriving statistics from technical replicates or less than 3 biological replicates, unless there is a clear scientific justification for why providing this information is important. Conflating technical and biological variability, e.g., by pooling technically replicates samples across independent experiments is strongly discouraged. |  |
| **Please note that this information is missing in the legend(s) of figure(s) 2e; 5f and in the legend(s) of extended data figure(s) 1a; 2a; 3b-c; 7b; 8a-b; 9; 13b.** | We have added the missing information in the legend(s) of figure(s) 2e; 5f and in the legend(s) of extended data figure(s) 2a; 3b-c; 7b (new supplementary figure 3b); 8a-b (new supplementary figure 4a-b); 13b (extended data figure 7b). We have added the n number in extended data figure 1a and 9 (new supplementary figure 5) directly. |
| All error bars need to be defined in the legends (e.g. SD, SEM) together with a measure of centre (e.g. mean, median). For example, the legends should state something along the lines of “Data are presented as mean values +/- SEM” as appropriate. All box plots need to be defined in the legends in terms of minima, maxima, centre, bounds of box and whiskers and percentile. |  |
| **Please note that the measure of centre for the error bars/error bands needs to be defined in the legend(s) of figure(s) 5f and in the legend(s) of extended data figure(s) 7b; 13b.** | We have defined the measure of center for the error bars/error bands in the legend(s) of figure(s) 5f and in the legend(s) of extended data figure(s) 7b (new supplementary figure 3b); 13b (new extended data figure 7b). |
| The figure legends must indicate the statistical test used. Where appropriate, please indicate in the figure legends whether the statistical tests were one-sided or two-sided and whether adjustments were made for multiple comparisons. For null hypothesis testing, please indicate the test statistic (e.g. F, t, r) with confidence intervals, effect sizes, degrees of freedom and P values noted. Please provide the test results (e.g. P values) as exact values whenever possible and with confidence intervals noted. | We have specified it was one-sided test in the legend of figure 2b. As it is not multiple comparisons, we didn’t made adjustments. |
| **Please indicate the statistical test used for data analysis and where appropriate, please specify whether it was one-sided or two-sided and whether adjustments were made for multiple comparisons, in the legend(s) of figure(s) 2b.  Please note that the exact p value should be provided, when possible, in the legend(s) of figure(s) 2b.** | We have provided the exact p value in the figure(s) 2b directly. |
| All figures, tables and extended data figures must be cited in the main text, and numbered in the order in which they appear. | We have made sure that all figures, tables and extended data figures are cited in the main text, and numbered in the order in which they appear. |
| Tables may not contain colour - please reformat your tables to black and white | We have reformatted the tables to black and white. |
| If bold/italic formatting in tables is necessary, please define its meaning in a table footnote | We have removed the bold/italic formatting in tables. |
| Figure legends/captions should not exceed 350 words. Please shorten by removing detailed methodological information and/or interpretation, or, if appropriate, consider splitting the affected figures in two. | We have limited figure legends/captions to 350 characters. |
|  |  |
| **Data and Code** |  |
| Our guidance: | Your response: |
| Nature journals strongly support public availability of data and code. Please deposit the data and code used in your paper into a public data repository, or alternatively, present the data as Supplementary Information. If data can only be shared on request, please explain why in your Data Availability Statement, and also in the correspondence with your editor.   Please note that for some data types, deposition in a public repository is mandatory. Any restrictions on sharing of these data types must be clearly indicated in the statement and discussed with the editor. More information on our data deposition policies and available repositories can be found here: | The details of accessing the datasets, including accession number, citation, and access link/CLI are described in ‘Data availability’ section.  The TNBC Xenium data generated in this study have been deposited in the GEO database under accession code GSE293199. |
| <https://www.nature.com/nature-research/editorial-policies/reporting-standards#availability-of-data> | We have deposited our code on GitHub and the “code availability” statement in our manuscript has described how could the code be accessed. |
| All published manuscripts reporting original research in Nature Portfolio journals must include a data availability statement, within the Methods and under the heading 'Data Availability'.   The data availability statement must make the conditions of access to the “minimum dataset” that are necessary to interpret, verify and extend the research in the article, transparent to readers.   This minimum dataset may be provided through deposition in public community/discipline-specific repositories, custom proprietary repositories or general repositories like Figshare, Zenodo and Dryad. Providing large datasets in supplementary information is strongly discouraged and the preferred approach is to make data available in repositories. Scientific Data, a Nature Portfolio journal, maintains a list of approved and recommended data repositories to support researchers seeking suitable repositories for their data (https://www.nature.com/sdata/policies/repositories).  The Data Availability Statement should also reference any source data published alongside the paper.  If DOIs are provided, we also require including these in the Reference list (authors, title, publisher (repository name), identifier, year).  For clinical datasets or third party data, please ensure that the statement adheres to our policy (https://www.nature.com/nature-research/editorial-policies/reporting-standards#availability-of-data) | We have made sure that our 'Data Availability' section makes the conditions of access to the “minimum dataset” that are necessary to interpret, verify and extend the research in the article, transparent to readers. |
| Specific advice on your Data Availability Statement: |  |
| Please provide separate Data and Code Availability Statements and descriebe data availability in the DAS. | We have provided separate Data and Code Availability Statements and describe data availability in the DAS. |
| Please find attached to our decision letter a marked up copy of your reporting summary. After making the requested changes, please be sure to include the final version of your reporting summary, without our comments, in your submission as a supplementary information file. The reporting summary will be published alongside the paper. Please note that this form is a dynamic 'smart pdf' and must therefore be downloaded and completed in Adobe Reader, instead of opening it in a web browser | We have updated our reporting summary following all the comments. |
|  |  |
| **Methods** |  |
| Our guidance: | Your response: |
| Methods do not have a strict limit but we suggest 3,000 words as a guideline. Your Methods section is currently 4515 words. The Methods section will be fully copy-edited and will appear online in the full-text HTML and PDF versions of your article. References associated with the Methods section should be listed separately at the end of the section, and numbered as a continuation of the main manuscript references. | We have limit Methods to 3050 words and listed separately the references associated with the Methods section at the end of the section and numbered as a continuation of the main manuscript references. |
|  |  |
|  |  |
| **End matter** |  |
| Our guidance: | Your response: |
| Please supply an "Author Contributions" section after the "Acknowledgements" section that refers to all authors. For more information on the Author Contributions statement, please refer to our authorship policy(https://www.nature.com/nature-research/editorial-policies/authorship), and to the following Nature Editorial: https://www.nature.com/articles/4581078a. | We have supplied an "Author Contributions" section after the "Acknowledgements" section that refers to all authors. |
| Nature Portfolio defines Competing Interest (CI) as financial and non-financial interests (including but not limited to funding, employment, stocks, shares, patents, personal or professional relationships with individuals or institutions, and unpaid membership advocacy) that could be perceived to directly undermine the objectivity, integrity, and value of a publication, or could be seen as having an influence on the judgments and actions of authors with regard to objective data presentation, analysis, and interpretation.  Please thoroughly review our policy on Competing Interests and include a detailed statement both in your final manuscript file and in our manuscript tracking system. Please ensure the statements are identical in both. Be specific about how each point stated relates to the research and list applicable author initials, and/or patent numbers.  If there are no competing interests, a negative statement must be included. | We have thoroughly reviewed the policy on Competing Interests and confirmed that there are no competing interests. We made sure that a negative statement is included in our manuscript. |
| <https://www.nature.com/nature-research/editorial-policies/competing-interests> |  |
| Please confirm that all relevant funding awarded to each author is described in the Acknowledgements section. List each grant number, followed by the initials of the author who received it. | We have confirmed that all relevant funding awarded to each author is described in the Acknowledgements section, listing each grant number, followed by the initials of the author who received it. |
|  |  |
|  |  |
| **Preparing your manuscript files** |  |
| Our guidance: | Your response: |
| Unless otherwise stated please limit individual file sizes to approximately 30MB. We strongly encourage the use of repositories for large datasets or source data due to size considerations. | We have checked that each individual file size is less than 30 MB. |
| Please provide figures as individual vector files with editable text. Acceptable file types for figures are .ai, .eps, .pdf, .ppt or Chem Draw for fully editable vector-based art. For detailed guidance on figure preparation, see https://www.nature.com/documents/aj-artworkguidelines.pdf | We have provided figures as individual vector files with editable text. |
| Please provide Extended Data figures as individual files in .tiff, .jpg or .eps format, and provide legends/captions for each in the Inventory of Supporting Information. Please also ensure that each Extended Data figure is cited wihtin the main manuscript text. | We have provided Extended Data figures as individual files in .tiff format, and provided legends/captions for each in the Inventory of Supporting Information. We also ensured that each Extended Data figure is cited within the main manuscript text. |
| Please supply the main Supplementary Information file as a single PDF file. | We have supplied the main Supplementary Information file as a single PDF file. |
| Please supply Supplementary Software as a ZIP file and provide a legend/caption for it in the Inventory of Supporting Information. Please also ensure that the Supplementary Software is cited within the main manuscript text. | We do not have Supplementary Software. |
| Please provide Supplementary Tables as a single workbook with multiple tabs, not as individual files. | We have provided Supplementary Tables as a single workbook with multiple tabs. |
| It is your responsibility to obtain the right to use any items (figures, tables, images, videos or text boxes) that are reproduced (or adapted) from material for which you do not hold copyright and to give proper attribution to the creators of that work. This includes work that has previously been published elsewhere.  If you do not hold the copyright for any item (in whole or part), included in your paper, you must complete and return a Third Party Rights Table (linked below)  If any elements of your submitted work have been created with BioRender you will need to ensure you have obtained a publication license from BioRender, adhering to the user requirements as outlined within the license. The reference for BioRender created graphics should be present in the accompanying legend of the display material it is present in.  A copy of the publication license should be uploaded to our system as a related manuscript file upon resubmission.  For more information please see the BioRender knowledge article here: https://help.biorender.com/hc/en-gb/articles/21283116932765-CC-BY-publishing-and-reader-permissions  For more information on what constitutes ownership by a third party, please contact our Editorial Assistant at methods@us.nature.com | We have added the reference for BioRender created graphics. |
| https://www.nature.com/documents/thirdpartyrights-origres.docx | We have uploaded a copy of the publication license. |
| Please check in particular: |  |
| **Figure 1, Figure 2** |  |
|  |  |
| **Forms to complete** |  |
| Our guidance: | Your response: |
| **Editorial Policy Checklist** |  |
| Please update and upload a final version of the Editorial Policy Checklist with your revised manuscript files. A blank Editorial Policy Checklist can be found via the link below. Note that this form is a dynamic ‘smart pdf’ and must be downloaded and completed in Adobe Reader. | We have updated our final version of the Editorial Policy Checklist. |
| Please update your current checklist or download from: |  |
| <https://www.nature.com/documents/nr-editorial-policy-checklist.pdf> |  |
| **Reporting Summary** |  |
| Please update your current checklist or download from: | We have updated our final version of the Reporting Summary. |
| https://www.nature.com/documents/nr-reporting-summary.pdf |  |
| **Inventory of Supporting Information** |  |
| The inventory must be completed with details of all Supplementary Information, Extended Data and Source Data files.   Please download from: | We have completed the form of the “Inventory of Supporting Information”. We do not have ‘3 Source Data’, so we left the table empty. |
| http://www.nature.com/documents/Inventory_of_Supporting_Information_2021.docx |  |
| **You will need to upload:** |  |
| Editorial Policy Checklist | We completed and uploaded. |
| Completed Third Party Rights Table (if relevant) | We completed and uploaded. |
| A point-by-point response to the reviewers' comments | We completed and uploaded. |
| A completed copy of this checklist | We completed and uploaded. |
| The main article file in either Microsoft Word format or LaTeX format. If using Microsoft Word, please supply a version with tracked changes and a version with tracked changes accepted | We provided the main article file with a version with tracked changed word and a version with tracked changed accepted. |
| Separate Figure files | We upload the figure files separately. |
| Separate Extended Data files | We upload the figure files separately. |
| Inventory of Supporting Information | We completed and uploaded. |
| A Supplementary Information file | We completed and uploaded. |
| Supplementary Table, Video, Audio, Data, or Software files | We have provided Supplementary Tables as a single workbook with multiple tabs. We do not have Video, Audio, Data, or Software files to be submitted. |
| Reporting Summary | We completed and uploaded. |
|  |  |
