# Supplementary material for: A visual–omics foundation model to bridge histopathology image with transcriptomics
Source: Research Square preprint supplement (doi:10.21203/rs.3.rs-5183775/v1), 2025-04-16
Supplement: Supplementary file 2 [file 095324f1af9810f960e8061e.docx]

| **third party material information** |
| --- |

| **Corresponding Author:** | **Guangyu Wang** |
| --- | --- |
| **Manuscript Number (if applicable):** | **NMETH-A58071A** |
|  |  |

If your article contains any display items (images, figures, tables, videos or text boxes, or other material), or any elements within any display items, that are adapted or reproduced from a previously published work (**including your own publications,** preprints and accepted articles), or that are not published but owned by a third-party (for example, a colleague, image databases, websites etc.), please provide us with the details of the original source in the below table**. Our office must obtain all the appropriate permissions to use this third-party content in your work, so please ensure that all third party display items are listed in the table below even if you have already requested and received permission for publication in your submitted article.**

**Please note that we may not always be able to include material that is owned by third-parties; in which case we will contact you for alternatives.**

For previously published items, please provide the contact details of the corresponding author of the original publication. For unpublished items please give the contact details of the copyright holder.

If you have any questions regarding terms of reuse, copyright terms, or what constitutes third-party ownership, please contact us.

| **Please complete the table and return the document in word format.** | | | | | | ***OFFICE USE ONLY*** | | | |
| --- | --- | --- | --- | --- | --- | --- | --- | --- | --- |
| **Display item number (including panel) in your manuscript**  (E.g.: Fig 1A, Table 2 etc.) | **Adapting** (if changes are made or requested) **or reproducing** (if published exactly as in the source)? | **Name and email of the rights holder** (corresponding author, artist, colleague etc.) | **Reference of the original publication** (i.e. Title, Author, Publisher, Publication, Year, Volume, Issue, Page Number, CC license)**, and full URL to the article or other source**, *if applicable.* | **Reference number of the original publication in your manuscript** (E.g.: Reference 10) | **Display item number (including panel) in original publication*,*** *if applicable*(E.g.: Fig 3C, Table 2 etc.) | ***HOUSE STYLE?*** | ***ADDITIONAL INFO***  *Include the following if house style is:*  ***Non-SN*** *– Publisher*  ***CC*** *– CC license version, plus link to CC license*  ***Unpublished*** *– Copyright Holder* | ***ALTERNATIVE CREDIT***  ***IF NOT HOUSE STYLE***  *Credit line provided by copyright holder,*  *or specified in license terms* | ***LICENSE COLLECTED***  *(Y/N)*  *and* ***cost****, if applicable* |
| Fig 1b, Fig 1d, Fig2a, Fig 5h | Adapting | BioRender  support@biorender.com | N/A | N/A | N/A | Choose an item. |  |  |  |
|  |  |  |  |  |  | Choose an item. |  |  |  |
|  |  |  |  |  |  | Choose an item. |  |  |  |
|  |  |  |  |  |  | Choose an item. |  |  |  |
|  |  |  |  |  |  | Choose an item. |  |  |  |
|  |  |  |  |  |  | Choose an item. |  |  |  |
|  |  |  |  |  |  | Choose an item. |  |  |  |
