# Supplementary material for: A visual–omics foundation model to bridge histopathology image with transcriptomics
Source: Research Square preprint supplement (doi:10.21203/rs.3.rs-5183775/v1), 2025-04-16
Supplement: Supplementary file 5 [file e639c7e03aceaed413b8bf72.docx]

Inventory of Supporting Information

**Manuscript #:** NMETH-A58071A

| Please complete each of the Inventory Tables below to outline your Extended Data and Supplementary Information items.  There are four sections:   - *Extended Data* - *Supplementary Information: PDF Files* - *Supplementary Information: Additional Files* - *Source Data*   Each section includes specific instructions. Please complete these tables as fully as possible. We ask that you avoid using spaces in your file names, and instead use underscores, i.e.: Smith_ED_Fig1.jpg not Smith ED Fig1.jpg  Please note that titles and descriptive captions will only be lightly edited, so please ensure that you are satisfied with these prior to submission.  If you have any questions about any of the information contained in this inventory, please contact the journal. |
| --- |
|  |

**Corresponding author name(s):** Guangyu Wang

1. **Extended Data**

**Complete the Inventory below for all Extended Data Figures and Tables**

- Keep Figure/Table titles to one sentence only
- Upload your files as ‘Figure Files’ in our Manuscript Tracking system
- File names should include the Figure/Table Number. i.e.: *Smith_ED_Fig1.jpg*
- Please be sure to include the file extension in the Filename. Note that Extended Data files (including tables) must be submitted as .jpg, .tif or .eps files *only*, and should be no more than 10MB
- All Extended Data item legends must be provided in the Inventory below and should not exceed 300 words each *(if possible)*
- Please include Extended Data *ONLY* in this table

| Figure or Table #  Please group Extended Data items by type, in sequential order. Total number of items (Figs. + Tables) must not exceed 10. | Figure/Table title  One sentence only | Filename  Whole original file name including extension. i.e.: Smith_ED_Fig1.jpg | Figure/Table Legend  If you are citing a reference for the first time in these legends, please include all new references in the main text Methods References section, and carry on the numbering from the main References section of the paper. If your paper does not have a Methods section, include all new references at the end of the main Reference list. |
| --- | --- | --- | --- |
| Extended Data Fig. 1 | **Image and transcriptomic representations.** | ED_Fig_1.tiff | **a,** Clustering performance on ST-bank data with cell type annotation. Left: clustering performance using transcriptomic embeddings generated from OmiCLIP model before and after training. Right: clustering performance usings image embeddings from OmiCLIP model before and after training. The Calinski-Harabasz scores were calculated on the embeddings (Methods) using the pretrained OmiCLIP transcriptomic (left) and image (right) encoders, evaluated for each organ type. Higher Calinski-Harabasz scores indicate better separation capability between clusters of the embeddings. In the box plots, the middle line represents the median, the box boundaries indicate the interquartile range, and the whiskers extend to data points within 1.5× the interquartile range.  **b,** Image and transcriptomic embeddings of the lung, kidney cancer, healthy heart, and Myocardial Infarction (MI) heart samples. Each row corresponds to a WSI and showcases information from two modalities. The first column are H&E images showing tissue morphology; the second column are the heatmaps of ST data with the colors indicating the cell types; the third column are the UMAP of image embeddings colored by cell types before and after contrastive learning; the fourth column are the UMAP of transcriptomics embeddings colored by cell types before and after contrastive learning. |
| Extended Data Fig. 2 | **Image and transcriptomic representations analysis.** | ED_Fig_2.tiff | **a,** Clustering performance on all ST-bank data. Top: clustering performance using transcriptomic embeddings generated from OmiCLIP model before and after training. Bottom: clustering performance usings image embeddings from OmiCLIP model before and after training, and image embeddings generated from UNI and Pro-GigaPath, respectively.The Calinski-Harabasz scores were calculated on the embeddings using the pre-trained OmiCLIP transcriptomic (top) and image (bottom) encoders, evaluated for each organ type. Higher Calinski-Harabasz scores indicate better separation capability between clusters of the embeddings. In the box plots, the middle line represents the median, the box boundaries indicate the interquartile range, and the whiskers extend to data points within 1.5× the interquartile range. Sample sizes are skin: 163, brain: 119, breast: 97, heart: 73, kidney: 73, embryo: 73, others: 64, liver: 57, prostate: 49, spinal cord: 44, ovary: 32, colon: 29, pancreas: 25, lung: 22, tonsil: 18, uterus: 17, adipose: 15, small intestine: 14, and stomach: 12.  **b,** Image and transcriptomic embeddings of the spinal cord, liver cancer, brain cancer, kidney cancer and skin cancer samples. Each row corresponds to a WSI and showcases information from two modalities. The first column are H&E images showing tissue morphology; the second column are the heatmaps of ST data with the colors indicating the ST data clustering using Leiden algorithm (Methods); the third column are the UMAP of image embeddings colored by ST Leiden clusters before and after contrastive learning; the fourth column are the UMAP of transcriptomics embeddings colored by ST Leiden clusters before and after contrastive learning. |
| Extended Data Fig. 3 | **OmiCLIP’s robustness for image quality and sequencing depth.** | ED_Fig_3.tiff | **a,** Example image with low-quality region marked in red line and simulated low-quality image by adding Gaussian noise.  **b,** Cosine similarity of paired transcriptomic and image embeddings using OmiCLIP (original image and simulated low-quality image), PLIP (original image), and OpenAI CLIP (original image). In the box plots, the middle line represents the median, the box boundaries indicate the interquartile range, and the whiskers extend to data points within 1.5× the interquartile range. Sample sizes are 10 for each simulated condition.  **c,** Cosine similarity of the paired image with transcriptomic embeddings using OmiCLIP (original transcriptomes and down sampled transcriptome from high sequencing depth to middle sequencing depth, middle sequencing depth to low sequencing depth, and high sequencing depth to low sequencing depth, respectively), PLIP (original transcriptome), and OpenAI CLIP (original transcriptome). In the box plots, the middle line represents the median, the box boundaries indicate the interquartile range, and the whiskers extend to data points within 1.5× the interquartile range, n=500. |
| Extended Data Fig. 4 | **Visium and Xenium tissue alignment.** | ED_Fig_4.tiff | Tissue alignment results on breast cancer sample using Loki Align. Left: Source Xenium ST data; Middle: Target Visium ST data; Right: Xenium ST data after Loki alignment. |
| Extended Data Fig. 5 | **Cell type decomposition of TNBC case study.** | ED_Fig_5.tiff | **a,** Xenium data from our in-house TNBC patient sample, colored by Louvain clusters and cell types, respectively.  **b,** H&E image, marker gene expression (KRT7, ATCG2, RORC), and cell type distribution in an example zoom-in region of the TNBC sample.  **c,** Cell type decomposition results on 3 major cell types of the TNBC sample using ST by RCTD, CARD, scGPT, Spatial Seurat, scFoundation, GeneFormer, CytoSPACE, Cell2location, and SpatialDWLS, respectively. The color of the heatmap reflects the z-score, calculated by the enrichment of each cell type. |
| Extended Data Fig. 6 | **Cell type decomposition of** **colorectal case study.** | ED_Fig_6.tiff | **a,** UMAP representation of the OmiCLIP transcriptomic embeddings colored by cell types, where each dot represents a spot.  **b,** Cell type decomposition result using Loki ST decomposition and Loki image decomposition respectively on human colorectal sample within the Visium HD capture area, and ground truth. Heatmap shows the cell type distribution of tumor, fibroblast, smooth muscle, and intestinal epithelial, respectively, with color reflecting the probability of each cell type. |
| Extended Data Fig. 7 | **Cell type decomposition of fine-tuning, pre-training, and train from scratch.** | ED_Fig_7.tiff | **a,** Cell type decomposition results on 3 major cell types of the TNBC sample using Loki Decompose Image-to-ST (fine-tuning, pre-training, and train from scratch). The color of the heatmap reflects the z-score, calculated by the enrichment of each cell type.  **b,** Bar plot shows the accuracy of decomposition of 3 major cell types by Loki Decompose Image-to-ST (fine-tuning, pre-training, and train from scratch). Error bar is standard deviation with center measured by mean. |
| Extended Data Fig. 8 | **Examples of ST gene expression prediction.** | ED_Fig_8.tiff | H&E images, ground truth ST gene expression, and ST gene expression predicted by Loki, Hist2ST, HisToGene, BLEEP, and mclSTExp, respectively. |
| Extended Data Fig. 9 | **Comparison of ST gene expression prediction performances.** | ED_Fig_9.tiff | **a,** Comparison of ST gene expression prediction performances, represented by MSE and PCC respectively on 39 normal heart tissues using Loki, Hist2ST, HisToGene, BLEEP, and mclSTExp, respectively. In the box plots, the middle line represents the median, the box boundaries indicate the interquartile range, and the whiskers extend to data points within 1.5× the interquartile range.  **b,** Summarized comparison of ST gene expression prediction performances, represented by MSE and PCC respectively across all samples using Loki, HisToGene, mclSTExp, BLEEP, and Hist2ST respectively. In the box plots, the middle line represents the median, the box boundaries indicate the interquartile range, and the whiskers extend to data points within 1.5× the interquartile range. |
| Extended Data Fig. 10 | **Summary of the fine-tuning settings for downstream tasks.** | ED_Fig_10.tiff | Recommendation settings for downstream tasks. |

***Do not insert additional rows - total number of Extended Data items must not exceed 10.***

1. **Supplementary Information:**
2. **PDF Files**

**Complete the Inventory below for all additional textual information and any additional Supplementary Figures, which should be supplied in one combined PDF file.**

- **Row 1:** A combined PDF containing any Supplementary Text, Discussion, Notes, Additional Supplementary Figures, Supplementary Protocols, simple tables, and all associated legends. **Only one such file is permitted**.
- **Row 2:** Nature Research’s Reporting Summary; if previously requested by the editor, please provide an updated Summary, fully completed, without any mark-ups or comments. **(Reporting Summaries are not required for all manuscripts.)**

**Note:** Please do not include a title page within your Supplementary Information file - a cover sheet that includes the title of your paper and a hyperlink to it will be automatically added while preparing your manuscript for publication

| Item | Present? | Filename  Whole original file name including extension. i.e.: Smith_SI.pdf. The extension must be .pdf | A brief, numerical description of file contents.  i.e.: *Supplementary Figures 1-4, Supplementary Discussion, and Supplementary Tables 1-4.* |
| --- | --- | --- | --- |
| Supplementary Information | Yes | Supplymentary_Information_File.pdf | Supplementary Figures 1-8 and Supplementary Notes 1-3. |
| Reporting Summary | Yes | nr-reporting-summary.pdf |
| Peer Review Information | Choose an item. | *OFFICE USE ONLY* |

1. **Additional Supplementary Files**

**Complete the Inventory below for all additional Supplementary Files that cannot be submitted as part of the Combined PDF.**

- Do not list Supplementary Figures in this table (see section 2A)
- Where possible, include the title and description within the file itself
- Spreadsheet-based tables & data should be combined into a workbook with multiple tabs, not submitted as individual files.
- Compressed files are acceptable where necessary. ZIP files are preferred.
- Please note that the *ONLY* allowable types of additional Supplementary Files are:

| - Supplementary Tables | - Supplementary Audio | - Supplementary Videos | - Supplementary Software |
| --- | --- | --- | --- |
| - Supplementary Code | - Supplementary Data, for example: - Source Data for Supplementary Figures - Raw NMR Data, Cryo-EM Data - Computational Data, Crystallographic Data, etc. | | |

| Type | Number  Each type of file (Table, Video, etc.) should be numbered from 1 onwards. Multiple files of the same type should be listed in sequence, i.e.: Supplementary Video 1, Supplementary Video 2, etc. | Filename  Whole original file name including extension. i.e.: *Smith_ Supplementary_Video_1.mov* | Legend or Descriptive Caption  Describe the contents of the file |
| --- | --- | --- | --- |
| Supplementary Table | Supplementary Table 1 | Supplementary_Table.xlsx | Supplementary Tables 1-4. |
| Choose an item. |  |  |  |
| Choose an item. |  |  |  |
| Choose an item. |  |  |  |
| Choose an item. |  |  |  |
| Choose an item. |  |  |  |

***Add rows as needed to accommodate the number of files.***

**3. Source Data**

**Complete the Inventory below for all Source Data files.**

- Acceptable types of Source Data for Main Figures and Extended Data Figures or Tables are:
  - Statistical Source Data
    - Plain Text (ASCII, csv, TXT) or Excel formats only
    - Either one file for each relevant Figure, or a single file containing all source data, with clearly named tabs for each Figure/Extended Data Figure item
  - Full-length, unprocessed gels or blots
    - JPG, TIF, or PDF formats only
    - One file for each relevant Figure containing all supporting blots and/or gels, or a single file with clearly labeled gels or blots for each Figure/ED Figure item
- Source Data for Supplementary Figures is not allowed. Instead:
  - Include Unprocessed Gels or Blots for Supplementary Figures as additional Supplementary Figures to the main Supplementary Information PDF file.
  - Include Statistical Source Data for Supplementary Figures as ‘Supplementary Data’ files and list them in section 2B.
  - Please see [this example of Source Data](https://www.nature.com/articles/s41591-019-0505-4) in a publication.

| Parent Figure or Table | Filename  Whole original file name including extension. i.e.: *Smith_SourceData_Fig1.xls,* or *Smith_ Unmodified_Gels_Fig1.pdf* | Data description  i.e.: Unprocessed western Blots and/or gels, Statistical Source Data, etc. |
| --- | --- | --- |
| Source Data Fig. 1 |  |  |
| Source Data Fig. 2 |  |  |
| Source Data Fig. 3 |  |  |
| Source Data Fig. 4 |  |  |
| Source Data Fig. 5 |  |  |
| Source Data Fig. 6 |  |  |
| Source Data Fig. 7 |  |  |
| Source Data Fig. 8 |  |  |
| Source Data Extended Data Fig./Table 1 |  |  |
| Source Data Extended Data Fig./Table 2 |  |  |
| Source Data Extended Data Fig./Table 3 |  |  |
| Source Data Extended Data Fig./Table 4 |  |  |
| Source Data Extended Data Fig./Table 5 |  |  |
| Source Data Extended Data Fig./Table 6 |  |  |
| Source Data Extended Data Fig./Table 7 |  |  |
| Source Data Extended Data Fig./Table 8 |  |  |
| Source Data Extended Data Fig./Table 9 |  |  |
| Source Data Extended Data Fig./Table 10 |  |  |
