# Supplementary material for: A visual–omics foundation model to bridge histopathology image with transcriptomics
Source: Research Square preprint supplement (doi:10.21203/rs.3.rs-5183775/v1), 2025-04-16
Supplement: Supplementary file 6 [file ec80d08ea38f5c0d99fc19b4.docx]

Inventory of Supporting Information

**Manuscript #:** NMETH-A58071A

**Corresponding author name(s):** Guangyu Wang

1. **Extended Data**

| Figure or Table #  Please group Extended Data items by type, in sequential order. Total number of items (Figs. + Tables) must not exceed 10. | Figure/Table title  One sentence only | Filename  Whole original file name including extension. i.e.: Smith_ED_Fig1.jpg | Figure/Table Legend  If you are citing a reference for the first time in these legends, please include all new references in the main text Methods References section, and carry on the numbering from the main References section of the paper. If your paper does not have a Methods section, include all new references at the end of the main Reference list. |
| --- | --- | --- | --- |
| Extended Data Fig. 1 | **Image and transcriptomic representations.** | ED_Fig_1.tiff | **a,** Clustering performance on ST-bank data with cell type annotation. Left: clustering performance using transcriptomic embeddings generated from OmiCLIP model before and after training. Right: clustering performance usings image embeddings from OmiCLIP model before and after training. The Calinski-Harabasz scores were calculated on the embeddings (Methods) using the pretrained OmiCLIP transcriptomic (left) and image (right) encoders, evaluated for each organ type. Higher Calinski-Harabasz scores indicate better separation capability between clusters of the embeddings. In the box plots, the middle line represents the median, the box boundaries indicate the interquartile range, and the whiskers extend to data points within 1.5× the interquartile range.  **b,** Image and transcriptomic embeddings of the lung, kidney cancer, healthy heart, and Myocardial Infarction (MI) heart samples. Each row corresponds to a WSI and showcases information from two modalities. The first column are H&E images showing tissue morphology; the second column are the heatmaps of ST data with the colors indicating the cell types; the third column are the UMAP of image embeddings colored by cell types before and after contrastive learning; the fourth column are the UMAP of transcriptomics embeddings colored by cell types before and after contrastive learning. |
| Extended Data Fig. 2 | **Image and transcriptomic representations analysis.** | ED_Fig_2.tiff | **a,** Clustering performance on all ST-bank data. Top: clustering performance using transcriptomic embeddings generated from OmiCLIP model before and after training. Bottom: clustering performance usings image embeddings from OmiCLIP model before and after training, and image embeddings generated from UNI and Pro-GigaPath, respectively.The Calinski-Harabasz scores were calculated on the embeddings using the pre-trained OmiCLIP transcriptomic (top) and image (bottom) encoders, evaluated for each organ type. Higher Calinski-Harabasz scores indicate better separation capability between clusters of the embeddings. In the box plots, the middle line represents the median, the box boundaries indicate the interquartile range, and the whiskers extend to data points within 1.5× the interquartile range. Sample sizes are skin: 163, brain: 119, breast: 97, heart: 73, kidney: 73, embryo: 73, others: 64, liver: 57, prostate: 49, spinal cord: 44, ovary: 32, colon: 29, pancreas: 25, lung: 22, tonsil: 18, uterus: 17, adipose: 15, small intestine: 14, and stomach: 12.  **b,** Image and transcriptomic embeddings of the spinal cord, liver cancer, brain cancer, kidney cancer and skin cancer samples. Each row corresponds to a WSI and showcases information from two modalities. The first column are H&E images showing tissue morphology; the second column are the heatmaps of ST data with the colors indicating the ST data clustering using Leiden algorithm (Methods); the third column are the UMAP of image embeddings colored by ST Leiden clusters before and after contrastive learning; the fourth column are the UMAP of transcriptomics embeddings colored by ST Leiden clusters before and after contrastive learning. |
| Extended Data Fig. 3 | **OmiCLIP’s robustness for image quality and sequencing depth.** | ED_Fig_3.tiff | **a,** Example image with low-quality region marked in red line and simulated low-quality image by adding Gaussian noise.  **b,** Cosine similarity of paired transcriptomic and image embeddings using OmiCLIP (original image and simulated low-quality image), PLIP (original image), and OpenAI CLIP (original image). In the box plots, the middle line represents the median, the box boundaries indicate the interquartile range, and the whiskers extend to data points within 1.5× the interquartile range. Sample sizes are 10 for each simulated condition.  **c,** Cosine similarity of the paired image with transcriptomic embeddings using OmiCLIP (original transcriptomes and down sampled transcriptome from high sequencing depth to middle sequencing depth, middle sequencing depth to low sequencing depth, and high sequencing depth to low sequencing depth, respectively), PLIP (original transcriptome), and OpenAI CLIP (original transcriptome). In the box plots, the middle line represents the median, the box boundaries indicate the interquartile range, and the whiskers extend to data points within 1.5× the interquartile range, n=500. |
| Extended Data Fig. 4 | **Visium and Xenium tissue alignment.** | ED_Fig_4.tiff | Tissue alignment results on breast cancer sample using Loki Align. Left: Source Xenium ST data; Middle: Target Visium ST data; Right: Xenium ST data after Loki alignment. |
| Extended Data Fig. 5 | **Cell type decomposition of TNBC case study.** | ED_Fig_5.tiff | **a,** Xenium data from our in-house TNBC patient sample, colored by Louvain clusters and cell types, respectively.  **b,** H&E image, marker gene expression (KRT7, ATCG2, RORC), and cell type distribution in an example zoom-in region of the TNBC sample.  **c,** Cell type decomposition results on 3 major cell types of the TNBC sample using ST by RCTD, CARD, scGPT, Spatial Seurat, scFoundation, GeneFormer, CytoSPACE, Cell2location, and SpatialDWLS, respectively. The color of the heatmap reflects the z-score, calculated by the enrichment of each cell type. |
| Extended Data Fig. 6 | **Cell type decomposition of** **colorectal case study.** | ED_Fig_6.tiff | **a,** UMAP representation of the OmiCLIP transcriptomic embeddings colored by cell types, where each dot represents a spot.  **b,** Cell type decomposition result using Loki ST decomposition and Loki image decomposition respectively on human colorectal sample within the Visium HD capture area, and ground truth. Heatmap shows the cell type distribution of tumor, fibroblast, smooth muscle, and intestinal epithelial, respectively, with color reflecting the probability of each cell type. |
| Extended Data Fig. 7 | **Cell type decomposition of fine-tuning, pre-training, and train from scratch.** | ED_Fig_7.tiff | **a,** Cell type decomposition results on 3 major cell types of the TNBC sample using Loki Decompose Image-to-ST (fine-tuning, pre-training, and train from scratch). The color of the heatmap reflects the z-score, calculated by the enrichment of each cell type.  **b,** Bar plot shows the accuracy of decomposition of 3 major cell types by Loki Decompose Image-to-ST (fine-tuning, pre-training, and train from scratch). Error bar is standard deviation with center measured by mean. |
| Extended Data Fig. 8 | **Examples of ST gene expression prediction.** | ED_Fig_8.tiff | H&E images, ground truth ST gene expression, and ST gene expression predicted by Loki, Hist2ST, HisToGene, BLEEP, and mclSTExp, respectively. |
| Extended Data Fig. 9 | **Comparison of ST gene expression prediction performances.** | ED_Fig_9.tiff | **a,** Comparison of ST gene expression prediction performances, represented by MSE and PCC respectively on 39 normal heart tissues using Loki, Hist2ST, HisToGene, BLEEP, and mclSTExp, respectively. In the box plots, the middle line represents the median, the box boundaries indicate the interquartile range, and the whiskers extend to data points within 1.5× the interquartile range.  **b,** Summarized comparison of ST gene expression prediction performances, represented by MSE and PCC respectively across all samples using Loki, HisToGene, mclSTExp, BLEEP, and Hist2ST respectively. In the box plots, the middle line represents the median, the box boundaries indicate the interquartile range, and the whiskers extend to data points within 1.5× the interquartile range. |
| Extended Data Fig. 10 | **Summary of the fine-tuning settings for downstream tasks.** | ED_Fig_10.tiff | Recommendation settings for downstream tasks. |

1. **Supplementary Information:**
2. **PDF Files**

| Item | Present? | Filename  Whole original file name including extension. i.e.: Smith_SI.pdf. The extension must be .pdf | A brief, numerical description of file contents.  i.e.: *Supplementary Figures 1-4, Supplementary Discussion, and Supplementary Tables 1-4.* |
| --- | --- | --- | --- |
| Supplementary Information | Yes | Supplymentary_Information_File.pdf | Supplementary Figures 1-8 and Supplementary Notes 1-3. |
| Reporting Summary | Yes | NMETH-A58071Breporting.pdf |
| Peer Review Information | Yes | *tpr.pdf* |

1. **Additional Supplementary Files**

| Type | Number  Each type of file (Table, Video, etc.) should be numbered from 1 onwards. Multiple files of the same type should be listed in sequence, i.e.: Supplementary Video 1, Supplementary Video 2, etc. | Filename  Whole original file name including extension. i.e.: *Smith_ Supplementary_Video_1.mov* | Legend or Descriptive Caption  Describe the contents of the file |
| --- | --- | --- | --- |
| Supplementary Table | Supplementary Table 1 | Supplementary_Table.xlsx | Supplementary Tables 1-4. |
